# Supplementary material for: Impedimetric immunoglobulin G immunosensor based on chemically modified graphenes
Source: Royal Society of Chemistry journal article supplement (doi:10.1039/c2nr11492e), 2011-12-20
Supplement: c2nr11492e.pdf [file c2nr11492e.pdf]

## *Supporting Information*

### **Impedimetric Immunoglobulin G Immunosensor based on Chemically Modified Graphenes**

**Adeline Huiling Loo, Alessandra Bonanni, Adriano Ambrosi, Hwee Ling Poh and  
Martin Pumera\***

Division of Chemistry & Biological Chemistry, School of Physical and Mathematical Sciences, Nanyang

Technological University, Singapore 637371

Fax: (65) 6791-1961

Email: [pumera@ntu.edu.sg](mailto:pumera@ntu.edu.sg)

\*Author for correspondence

## Nyquist plots of CMG materials

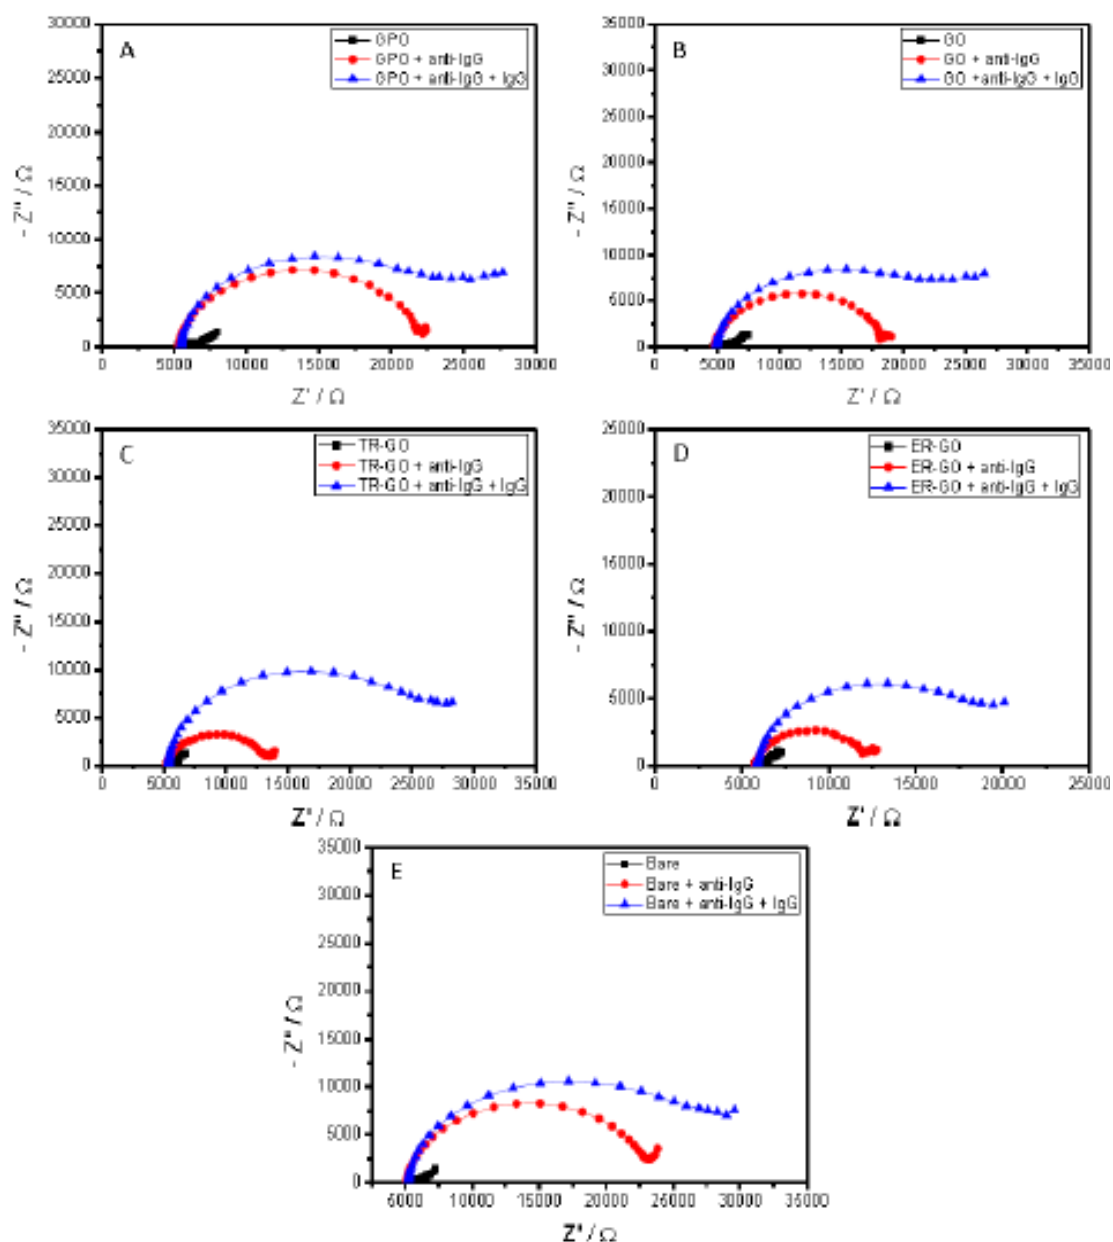

**Fig. S1** Nyquist plots ( $-Z''$  vs.  $Z'$ ) of the various CMG surfaces: (A) GPO (B) GO (C) TR-GO (D) ER-GO and (E) Bare (black), anti-IgG (red), IgG (blue). Concentration of anti-IgG used is 100  $\mu\text{g}/\text{ml}$ , concentration of IgG target is 10  $\mu\text{g}/\text{ml}$ . All measurements were performed with 10 mM  $\text{K}_4[\text{Fe}(\text{CN})_6] / \text{K}_3[\text{Fe}(\text{CN})_6]$  in PBS buffer solution (pH = 7.4) at room temperature.

From Figure S1, it can be observed that for all five platforms, charge transfer resistance ( $R_{ct}$ ) which corresponds to the diameter of the semi-circle, increases with immobilization of anti-IgG and further increases after incubation with IgG. In addition, it should also be noted that the surface which exhibited the greatest change in impedance signal after incubating with IgG

is TR-GO.

### Nyquist plots of anti-IgG optimization

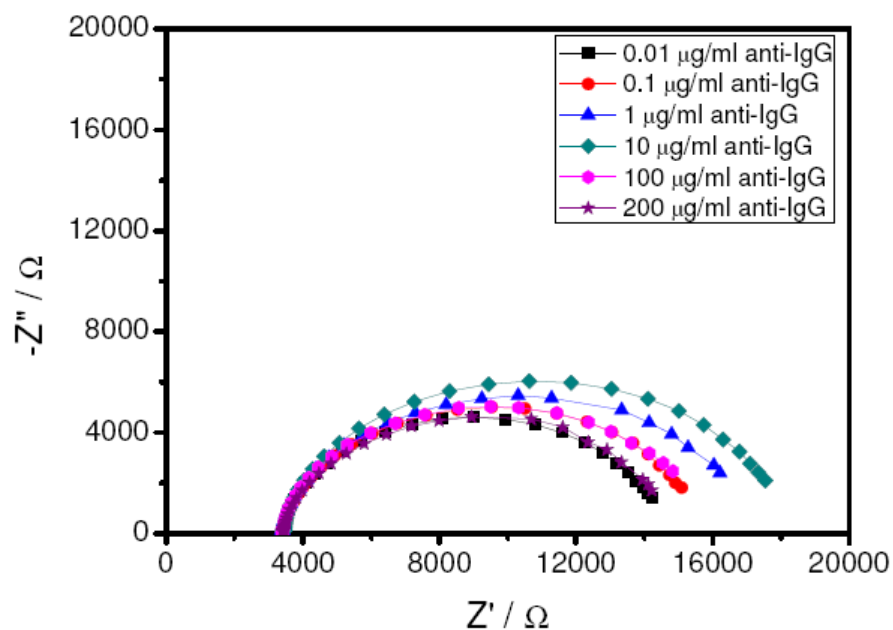

**Fig. S2** Nyquist plots ( $-Z''$  vs.  $Z'$ ) of the various concentrations of anti-IgG deposited on TR-GO modified DEP electrode surface. All measurements were performed with 10 mM  $K_4[Fe(CN)_6] / K_3[Fe(CN)_6]$  in PBS buffer solution (pH = 7.4) at room temperature.

### Nyquist plots of IgG calibration

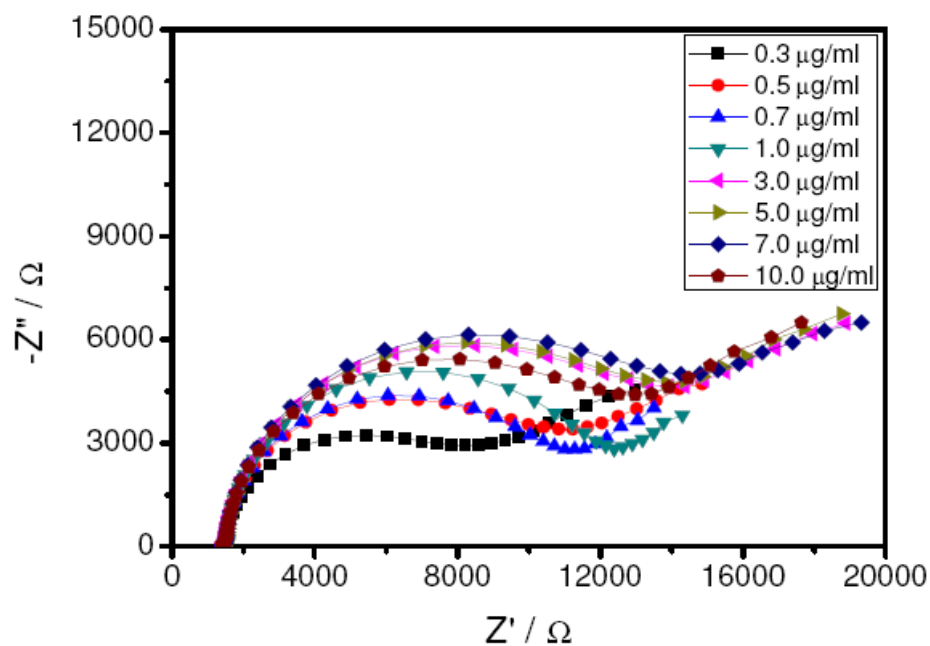

**Fig. S3** Nyquist plots ( $-Z''$  vs.  $Z'$ ) of the various concentrations of IgG incubated with. All measurements were performed with 10 mM  $K_4[Fe(CN)_6] / K_3[Fe(CN)_6]$  in PBS buffer solution (pH = 7.4) at room temperature.

### Nyquist plots of negative control study with BSA

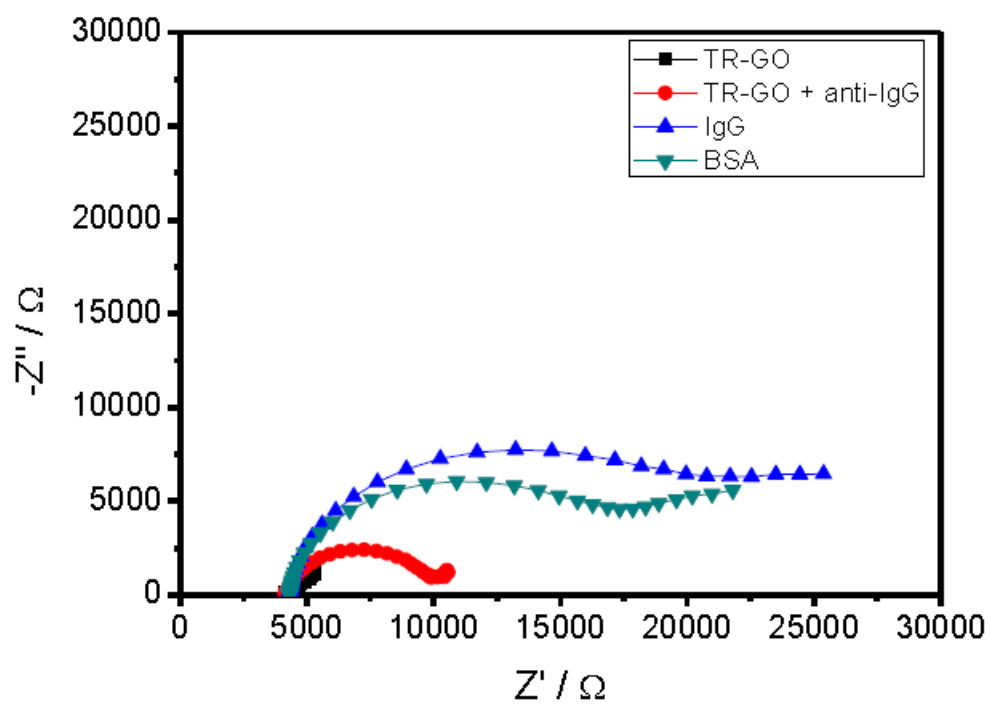

**Fig. S4** Nyquist plots ( $-Z''$  vs.  $Z'$ ) depicting the impedimetric response after the incubation with a different protein target. BSA was used as negative control. All measurements were performed with 10 mM  $K_4[Fe(CN)_6] / K_3[Fe(CN)_6]$  in PBS buffer solution (pH = 7.4) at room temperature.

### SEM study of CMGs electrode surface

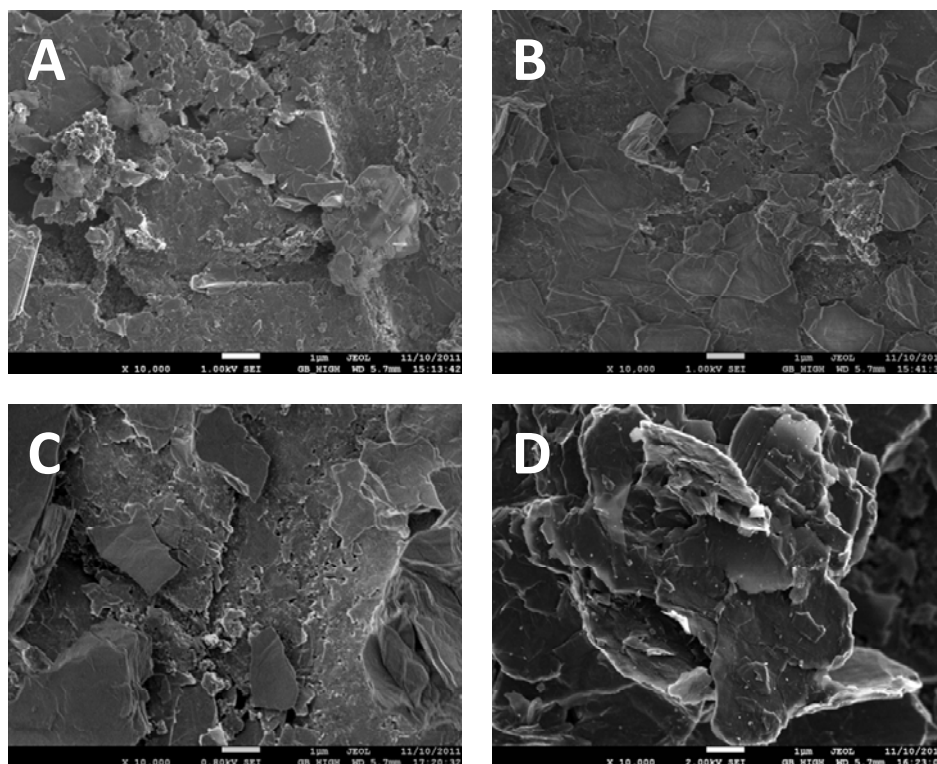

Figure S5. Scanning electron microscopy (SEM) images of: bare electrode (A); graphite oxide modified electrode (B); graphene oxide modified electrode (C); ER-GO modified electrode (D).

### SEM study of TR-GO electrode surface during the immunosensing

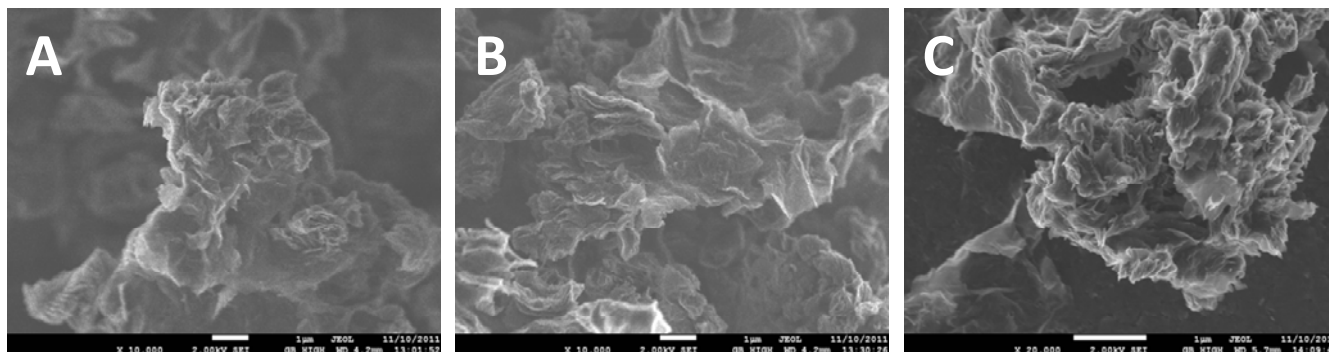

Figure S6. Scanning electron microscopy (SEM) images of: TR-GO modified electrode (A); TR-GO+anti-IgG modified electrode (B); TR-GO+anti-IgG+IgG modified electrode (C).
